# Supplementary material for: Radiogenomics in Renal Cancer Management—Current Evidence and Future Prospects
Source: MDPI journal article supplement (doi:10.3390/ijms24054615), 2023-02-27
Supplement: s1 [file s1]

Table S3 Radiogenomics studies on clear cell renal cell carcinoma

| <b>Radiomics features association with mutational status</b> | <b>Author/Year</b>           | <b>Study design/no patients</b> | <b>Primary outcome</b>                                             | <b>Results</b>                                                                                                                                                                                                                                                                                                                                                           |
|--------------------------------------------------------------|------------------------------|---------------------------------|--------------------------------------------------------------------|--------------------------------------------------------------------------------------------------------------------------------------------------------------------------------------------------------------------------------------------------------------------------------------------------------------------------------------------------------------------------|
|                                                              | Karlo et al./2014 [204]      | Retrospective/233               | Association of radiomics CT images and gene mutations              | Correlation with good defined tumor edges ( $p=0.013$ ), nodular tumor appearance ( $p=0.021$ ), brut enhancement of vascularity ( $p=0.018$ ) for VHL mutation and renal vein invasion $p=0.022$ for KDM5C and $p=0.046$ for BAP1. Mutations of SETD2, KDM5C and BAP1 were absent in multicystic lesions. Mutations of VHL and PBRM were associated with solid lesions. |
|                                                              | Shinagare et al./2015 [214]  | Retrospective/103               | Association of radiomics CT images and gene mutations              | BAP1 mutation correlated with poor defined tumor edges ( $p = 0.02$ and calcification ( $p=0.002$ ). MUC4 mutation correlated with exophytic development ( $p = 0.002$ )                                                                                                                                                                                                 |
|                                                              | Bowen et al./2018 [215]      | Retrospective/177               | Association of radiomics CT images and molecular m1 to m4 subtypes | m1 predicted good defined margins and m3 predicted less accurate defined margins, the probability of collector system and renal vein involvement.                                                                                                                                                                                                                        |
|                                                              | Marigliano et al./2019 [216] | Pilot retrospective/20          | Association of radiomics CT images and miRNA expression            | An association of entropy and miR-21-5p expression has been determined between ccRCC and benign tissue                                                                                                                                                                                                                                                                   |
|                                                              | Cianflone et al./2022 [217]  | Pilot retrospective/6           | Association of radiomics CT images and gene expression             | Four radiogenomics models have been identified to have a significant correlation between radiomics and transcriptomics.                                                                                                                                                                                                                                                  |
| Prediction of genes mutation status                          |                              |                                 |                                                                    |                                                                                                                                                                                                                                                                                                                                                                          |
|                                                              | Ghosh et al.2015 [205]       | Retrospective/78                | Association of radiomics CECT features to predict                  | Random forest model obtained AUC between 0.52 and 0.71 (best for nephrographic phase)                                                                                                                                                                                                                                                                                    |

|                                 |                            |                  |                                                                                                                  |                                                                                                                                                                           |
|---------------------------------|----------------------------|------------------|------------------------------------------------------------------------------------------------------------------|---------------------------------------------------------------------------------------------------------------------------------------------------------------------------|
|                                 |                            |                  | BAP1 mutation status                                                                                             | for BAP1 mutation prediction.                                                                                                                                             |
|                                 | Kocak et al./2019 [206]    | Retrospective/45 | ML CT radiomics features to predict PRBM1 mutation status                                                        | Best ACC and AUC for random forest models (95.0%, AUC = 0.987)                                                                                                            |
|                                 | Kocak et al.2020 [207]     | Retrospective/65 | ML CT radiomics features to predict BAP1 mutation status                                                         | Model SPEC of 78.8% and PREC of 81% for presence and absence of BAP1 mutations, respectively                                                                              |
|                                 | Chen et al.2019 [208]      | Retrospective/57 | ML CT radiomics features to predict gene mutation status                                                         | The SENS, SPEC and PREC for prediction of BAP1 mutation (90.4%, 78.8%, and 81%). The SENS, SPEC and PREC for prediction of BAP1 absent mutation (78.8%, 90.4%, and 89.1%) |
|                                 | Yin et al./2019 [210]      | Retrospective/23 | Multi-omics incorporating PET/MRI radiomics model to predict ccA or ccB molecular subtype                        | Correct classification rate (radiomics alone 86.96 vs. multi-omics 95.65%)                                                                                                |
|                                 | Feng et al./2020 [209]     | Retrospective/54 | ML CT radiomics features to predict BAP 1 mutation status                                                        | The prediction of BAP1 mutation achieved an AUC = 0.77, with SENS of 0.72, SPEC of 0.87, and PREC of 0.65                                                                 |
| Prediction of clinical outcomes |                            |                  |                                                                                                                  |                                                                                                                                                                           |
|                                 | Jamshidi et al./2015 [225] | Retrospective/70 | Radiogenomics risk score from CT image to predict gene expression and disease specific survival                  | Significant association of radiogenomic risk score with DSS (log-rank $p < 0.001$ )                                                                                       |
|                                 | Jamshidi et al./2016 [220] | Prospective/41   | Radiogenomics risk score predictive of radiologic progression free survival in immunotherapy neoadjuvant setting | A low RRS vs high RRS leads to a higher rPFS and OS when compared with high RRS (25 months vs. 6 months, $p=0.005$ ) and (37 months vs. 25 months, $p=0.03$ )             |

|  |                              |                        |                                                                                                         |                                                                                                                                                                                                                       |
|--|------------------------------|------------------------|---------------------------------------------------------------------------------------------------------|-----------------------------------------------------------------------------------------------------------------------------------------------------------------------------------------------------------------------|
|  | Cen et al./2019 [224]        | Retrospective/106      | Association of CT radiomics features and RUNX3 methylation level and survival                           | Independent predictors of high RUNX3 methylation are good vs. poor defined tumor edges and present vs absent intratumoral vascularity, AUC=0.725. Low RUNX3 methylation is associated with longer median OS (p<0.001) |
|  | Yu et al./2020 [219]         | Retrospective/212      | Association of CT radiomics features and DNA methylation subtyping and effects on overall survival      | The M1 subtype is associated with poor median OS (p<0.001)                                                                                                                                                            |
|  | Lee et al./2020 [211]        | Pilot retrospective/58 | Multiphase CT radiomics model to predict metastases and WTS gene expression                             | Radiogenomics approach achieved an AUC=0.955 for metastasis prediction                                                                                                                                                |
|  | Lin et al./2021 [212]        | Retrospective/160      | ML techniques to identify CT radiomics subtypes that have clinical involvement                          | C1 radiomics subtype with related mutation frequency revealed a lower OS (p=0.027) and PFI (p=0.002) than the C2 and C3 subtypes.                                                                                     |
|  | Zhao et al./2021 [213]       | Retrospective/547      | ML radiomics features to predict distant metastasis and gene modules associated with radiomics features | AUC 0.95 for metastasis prediction                                                                                                                                                                                    |
|  | Udayakumar et al./2021 [229] | Prospective/49         | Spatial DCE-MRI imaging features for prediction of molecular subtypes                                   | High PFS with TKI in tumors with high compared with low MRI vascularity (p<0.0001) and no difference in IO patients.                                                                                                  |
|  | Huang et al./2021 [218]      | Retrospective/205      | OS prediction through a radiogenomics model                                                             | Imaging-genomics prognostic factors achieved better AUCs vs imaging alone at 1, 3 and 5 years (AUC=0.814 vs. 0.837, 0.74 vs. 0.806, and 0.689 vs. 0.751)                                                              |
|  | Zeng et al./2021 [221]       | Retrospective/207      | Association of CT radiomics features                                                                    | The multiple omics model achieved best 5 years OS AUC                                                                                                                                                                 |

|  |                       |                   |                                                                                                    |                                                                                                                                                                        |
|--|-----------------------|-------------------|----------------------------------------------------------------------------------------------------|------------------------------------------------------------------------------------------------------------------------------------------------------------------------|
|  |                       |                   | and multiple omics and survival outcomes                                                           | (0.846)                                                                                                                                                                |
|  | Gao et al./2022 [222] | Retrospective/520 | Prognostic radiogenomics marker to predict gene expression and stratification of patients survival | Radiogenomics model (radiomics features and immune-related gene signature expression levels) had an AUC of 0.76 in the training group and 0.72 in the validation group |
|  | Gao et al./2022 [223] | Retrospective/521 | Prognostic radiogenomics marker and hypoxia related genes for prognosis prediction                 | Radiomics features and hypoxia genomics signature is associated with survival (AUC=0.91, both in training and validation group) and externally validated (p=0.0059)    |

ACC= accuracy; AUC= area under the curve; ccRCC= clear cell RCC; CT= computed tomography; CECT= contrast enhanced computed tomography; DCE-MRI= dynamic contrast-enhanced magnetic resonance imaging; DSS= disease specific survival; miRNA= micro ribonucleic acid; ML= machine learning; MRI= magnetic resonance imaging; OS= overall survival; PET/MRI= positron emission tomography/magnetic resonance imaging; PFS= progression free-survival; rPFS = radiological progression free survival; PREC= precision; RCC= renal cell carcinoma; RRS= radiogenomics risk score; SENS= sensitivity; SPEC= specificity; TKI= tyrosine kinase inhibitor; WTS= whole transcriptome sequencing;
