# Supplementary material for: Radiogenomics in Renal Cancer Management—Current Evidence and Future Prospects
Source: MDPI journal article supplement (doi:10.3390/ijms24054615), 2023-02-27
Supplement: s1 [file s1]

Table S2. Main MI modalities for RCC management.

| MI modality                                                | Potential Application                                                                  | Metabolic pathway and Main Features                                                                                              | Limitations                                                                                                                                                                    |
|------------------------------------------------------------|----------------------------------------------------------------------------------------|----------------------------------------------------------------------------------------------------------------------------------|--------------------------------------------------------------------------------------------------------------------------------------------------------------------------------|
| <sup>99m</sup> Tc-sestamibi SPECT/CT                       | Detection of ONC and HOCT                                                              | - Accumulates in cells with high mitochondrial content and low MRP expression                                                    | - Low spatial resolution                                                                                                                                                       |
| <sup>124</sup> I- and <sup>89</sup> Zr-girentuximab PET/CT | Detection of ccRCC, treatment response                                                 | - Targets CAIX (overexpressed in 95% ccRCC)<br>- Advantages over SPECT/CT (e.g., contrast and spatial resolution)                | - Long interval between radiotracer injection and PET/CT scan (3-7 days)<br>- High cost                                                                                        |
| <sup>18</sup> F-FDG PET/CT                                 | Detection of recurrent and metastatic RCC, prognosis and treatment response assessment | - Glycolysis and pentose phosphate pathway<br>- Targets malignant cells with increased aerobic glycolysis<br>- Readily available | - Physiological renal excretion<br>- Some RCC exhibit a low <sup>18</sup> F-FDG uptake<br>- Non-specifically taken up by any malignant cells with cytosolic aerobic glycolysis |
| <sup>68</sup> Ga-PSMA-11 PET/CT                            | Differentiation between malignant and benign lesions                                   | - PSMA is overexpressed in tumor-associated neovascular endothelial cells of numerous solid tumors<br>- Readily available        | - High accumulation in the kidney                                                                                                                                              |
| <sup>11</sup> C-acetate PET/CT                             | Differentiation between malignant and benign lesions                                   | - involved in numerous metabolic processes, including lipid synthesis (significantly upregulated in RCC)                         | - RCC shows high heterogeneity for acetate uptake                                                                                                                              |

MI= molecular imaging; RCC= renal cell carcinoma; SPECT= single photon emission computed tomography; PET= positron emission tomography; CT= computed tomography; PSMA= prostate-specific membrane antigen; <sup>18</sup>F-FDG= [<sup>18</sup>F] fluoro-D-glucose; ONC= oncocytoma; HOCT= hybrid oncocytic/chromophobe tumor; ccRCC=clear cell RCC; MRP= multidrug resistance pump; CAIX= carbonic anhydrase IX.
